# Supplementary material
Source: Royal Society of Chemistry journal article supplement (doi:10.1039/d6ya00009f)
Supplement: d6ya00009f1.pdf [file d6ya00009f1.pdf]

## Supplementary Information

### Lithium-ion electrosorption on lithium manganese oxide soft and bare electrodes

S. Orozco-Barrera<sup>1†</sup>, J. A. Lirio Piñar<sup>1†</sup>, C. Kök<sup>2,3</sup>, G. R. Iglesias<sup>1,4</sup>,  
A. V. Delgado<sup>1</sup>, V. Presser<sup>2,3,5\*</sup>, S. Ahualli<sup>1\*</sup>

- <sup>1</sup> Department of Applied Physics, School of Sciences, University of Granada, 18071 Granada, Spain.
- <sup>2</sup> INM - Leibniz Institute for New Materials, Campus D2 2, 66123 Saarbrücken, Germany.
- <sup>3</sup> Department of Materials Science & Engineering, Saarland University, Campus D2 2, 66123 Saarbrücken, Germany.
- <sup>4</sup> NanoMag Lab. Department of Applied Physics. Edificio I+D Josefina Castro, University of Granada, Spain.
- <sup>5</sup> saarene - Saarland Center for Energy Materials and Sustainability, Campus C4 2, 66123 Saarbrücken, Germany.

**\*Corresponding authors:**

V. Presser: [Volker.presser@leibniz-inm.de](mailto:Volker.presser@leibniz-inm.de)

S. Ahualli: [sahualli@ugr.es](mailto:sahualli@ugr.es)

† These authors contributed equally to this work

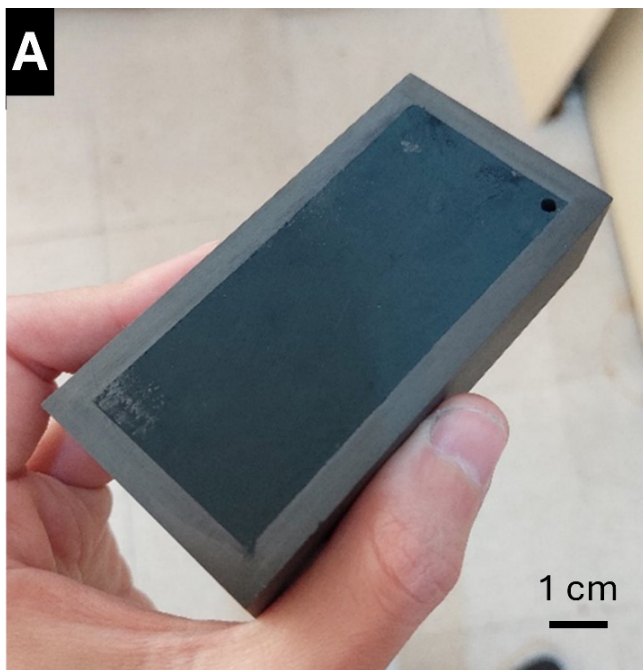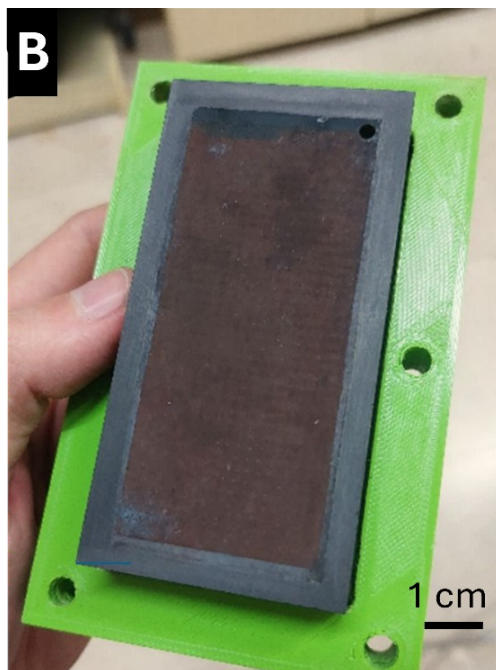

**Figure S1.** (A) LMO electrode deposited on the current collector before oxidation. (B) LMO electrode after the oxidation process, with a noticeable reddish color on the surface in contact with the solution.

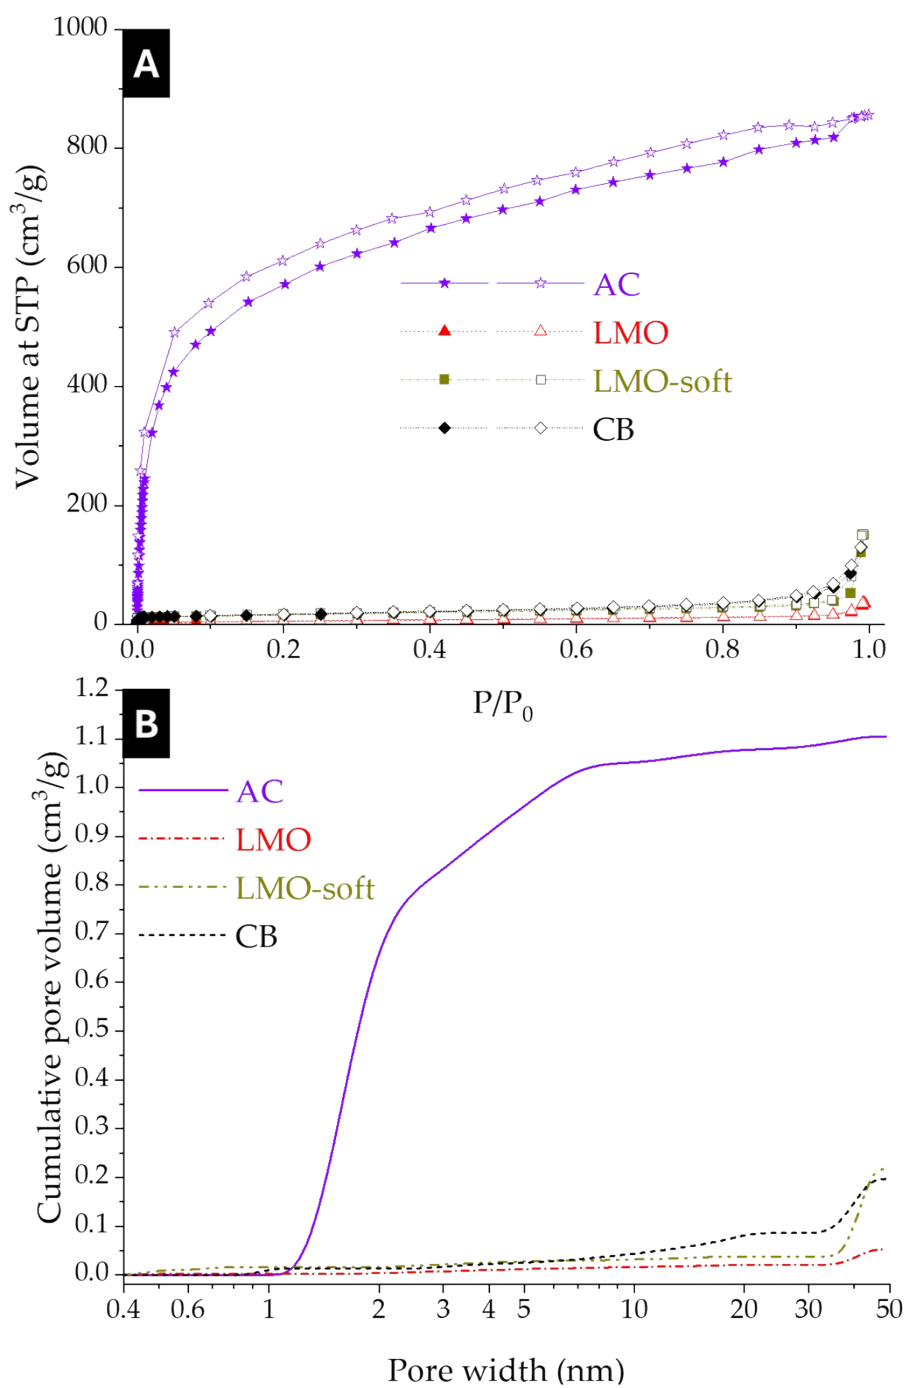

**Figure S2.** Nitrogen adsorption-desorption data recorded at -196°C of electrode components. (A) Adsorption isotherms expressed as volume at STP versus relative pressure. (B) Cumulative pore volume curves as a function of pore width, measured for AC, LMO, LMO-soft CB.

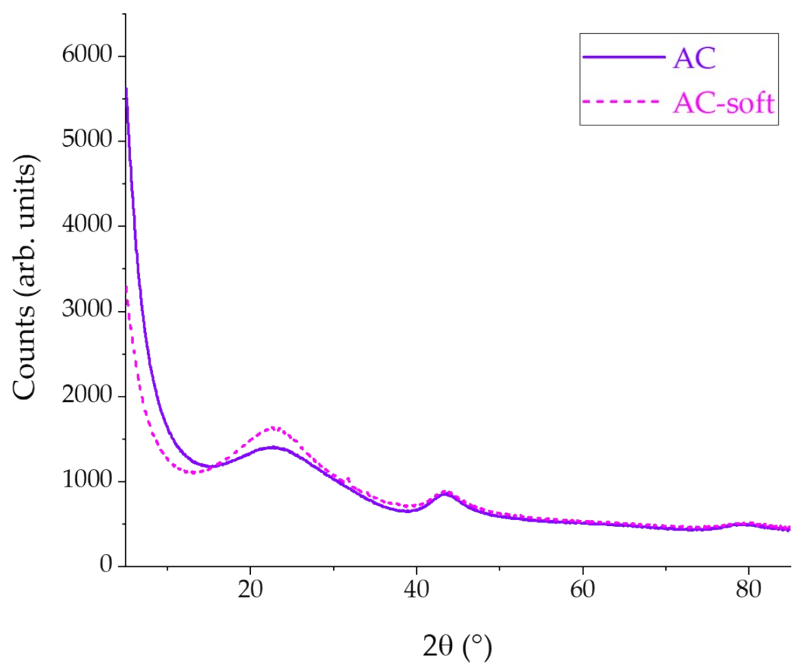

**Figure S3:** X-ray diffractograms of AC and AC-soft.

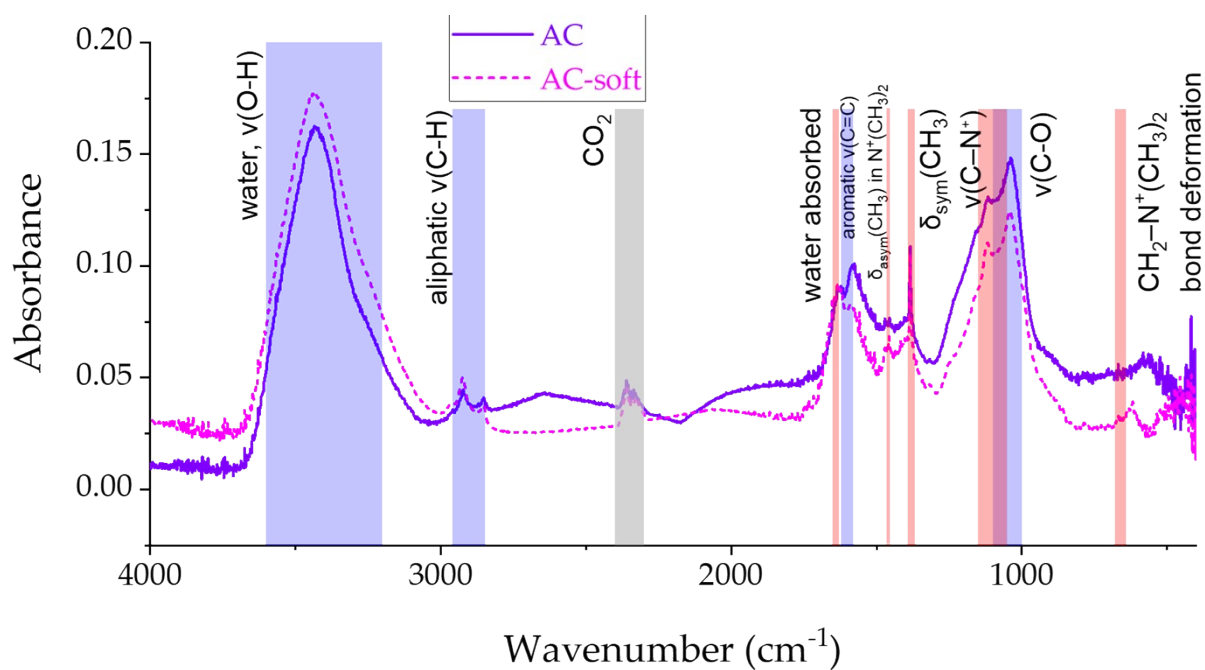

**Figure S4:** FTIR spectra of AC and AC-soft. Grey bands correspond to environmental contaminants ( $\text{H}_2\text{O}$ ,  $\text{CO}_2$ ), red bands to the PDADMAC coating, and blue bands to AC vibrations.

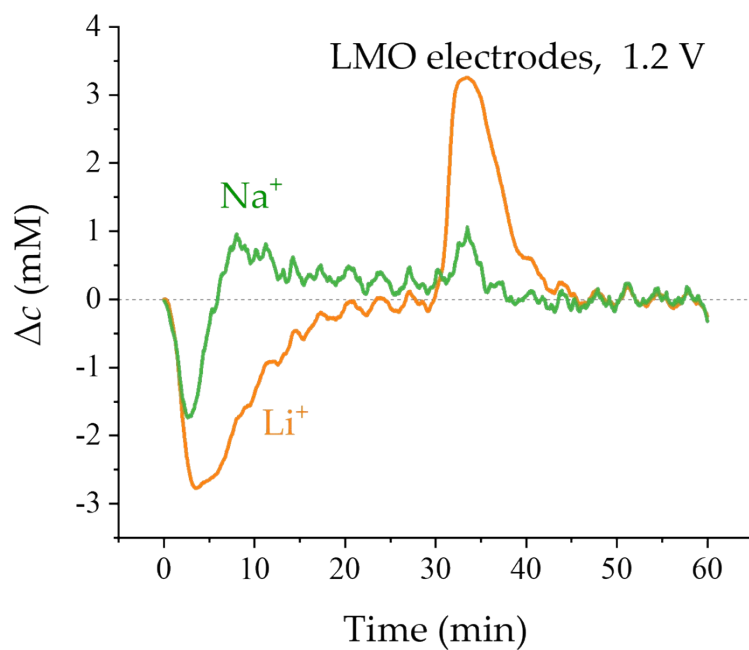

**Figure S5.** Differences between the outlet and inlet concentrations when desalting 5 mM LiCl + 5 mM NaCl for LMO electrodes. The cell voltage is 1.2 V.
